# Supplementary material for: Galaxy7TM: flexible GPCR–ligand docking by structure refinement
Source: PubMed Central journal article supplement — Nucleic Acids Res. 2016 Apr 29;44(Web Server issue):W502–6. doi: 10.1093/nar/gkw360 (PMC4987912; doi:10.1093/nar/gkw360), 2016-04-29
Supplement: supp_gkw360_nar-00442-web-b-2016-File004.pdf [file supp_gkw360_nar-00442-web-b-2016-File004.pdf]

## Supplementary Materials

**Table S1.** Comparison of Galaxy7TM with AutoDock Vina applied to input GPCR structures (Input-Vina) and to GPCR structures refined by MPrelax (MPrelax-Vina), and AutoDock Vina with flexible sidechains (VinaFlex) in terms of docking accuracy on a test set of 125 GPCR structure–ligand inputs when the best of ten predictions are considered.

| Uniprot ID | PDB ID | Template PDB ID <sup>a</sup> | Seq ID (%) <sup>b</sup> | Model building method <sup>c</sup> | Input structure GDT-HA <sup>d</sup> | Ligand RMSD (Å) |            |               |                        | Contact ratio (%) |            |               |           |
|------------|--------|------------------------------|-------------------------|------------------------------------|-------------------------------------|-----------------|------------|---------------|------------------------|-------------------|------------|---------------|-----------|
|            |        |                              |                         |                                    |                                     | Galaxy 7TM      | Input-Vina | MP relax-Vina | Vina Flex <sup>e</sup> | Galaxy 7TM        | Input-Vina | MP relax-Vina | Vina Flex |
| O43614     | 4s0v   | 4buo                         | 22.5                    | Galaxy                             | 61.9                                | 4.6             | 4.7        | 2.7           | 3.6                    | 14.8              | 13.0       | 33.3          | 13.0      |
| P07550     | 2rh1   | 4iaq                         | 35.5                    | Galaxy                             | 55.0                                | 2.3             | 4.5        | 10.5          | 4.7                    | 43.5              | 21.7       | 1.5           | 18.8      |
| P07550     | 3ny8   | 4iaq                         | 35.5                    | Galaxy                             | 54.5                                | 1.6             | 3.5        | 11.1          | 4.6                    | 43.4              | 24.5       | 0.0           | 15.1      |
| P07550     | 3sn6   | 4iaq                         | 35.5                    | Galaxy                             | 56.2                                | 2.3             | 3.2        | 10.5          | 4.4                    | 36.0              | 17.3       | 5.3           | 9.3       |
| P07550     | 4lde   | 4iaq                         | 35.5                    | Galaxy                             | 55.4                                | 2.3             | 2.7        | 10.5          | 5.1                    | 31.1              | 22.2       | 2.2           | 11.1      |
| P07550     | 3d4s   | 4iaq                         | 35.5                    | Galaxy                             | 54.4                                | 2.6             | 4.1        | 11.1          | 5.7                    | 37.7              | 18.8       | 4.4           | 15.9      |
| P07700     | 3zpr   | 4gbr                         | 59.9                    | Galaxy                             | 80.6                                | 0.8             | 3.4        | 7.5           | 4.1                    | 49.1              | 18.2       | 1.8           | 18.2      |
| P07700     | 4amj   | 4gbr                         | 59.9                    | Galaxy                             | 80.9                                | 1.7             | 1.4        | 2.3           | 1.0                    | 42.2              | 42.2       | 25.3          | 42.2      |
| P07700     | 4bvn   | 4gbr                         | 59.9                    | Galaxy                             | 77.8                                | 1.4             | 1.5        | 1.9           | 1.0                    | 34.3              | 41.8       | 32.8          | 38.8      |
| P07700     | 3zpq   | 4gbr                         | 59.9                    | Galaxy                             | 79.3                                | 0.7             | 2.3        | 1.4           | 2.4                    | 50.0              | 27.3       | 50.0          | 20.5      |
| P07700     | 5a8e   | 4gbr                         | 59.9                    | Galaxy                             | 76.2                                | 0.9             | 2.1        | 3.4           | 3.1                    | 57.0              | 26.6       | 21.5          | 22.8      |
| P07700     | 2y00   | 4gbr                         | 59.9                    | Galaxy                             | 79.0                                | 2.3             | 3.3        | 3.6           | 3.0                    | 33.9              | 20.3       | 33.9          | 18.6      |
| P08172     | 4mq5   | 4ldl                         | 28.0                    | Galaxy                             | 58.8                                | 4.1             | 5.4        | 5.9           | 6.5                    | 12.7              | 4.2        | 9.9           | 7.0       |
| P08172     | 3uon   | 4ldl                         | 28.0                    | Galaxy                             | 46.5                                | 3.2             | 5.7        | 13.3          | 5.5                    | 21.2              | 6.1        | 1.5           | 4.6       |
| P08483     | 4u15   | 3pds                         | 34.0                    | Galaxy                             | 60.3                                | 7.2             | 9.4        | 12.3          | 6.3                    | 5.8               | 2.3        | 1.2           | 11.5      |
| P21453     | 3v2w   | 3rfm                         | 26.6                    | Galaxy                             | 54.4                                | 5.7             | 7.1        | 5.5           | 5.8                    | 17.7              | 4.8        | 8.1           | 12.9      |
| P25116     | 3vw7   | 4phu                         | 21.1                    | Galaxy                             | 45.8                                | 6.9             | 6.7        | 7.6           | 7.2                    | 12.4              | 2.5        | 2.5           | 4.9       |
| P28222     | 4iaq   | 2rh1                         | 36.2                    | Galaxy                             | 59.0                                | 4.4             | 4.9        | 3.9           | 4.4                    | 28.6              | 14.3       | 23.8          | 17.9      |
| P28222     | 4iar   | 2rh1                         | 36.2                    | Galaxy                             | 55.9                                | 4.6             | 5.1        | 3.7           | 4.1                    | 19.1              | 11.2       | 23.6          | 18.0      |
| P29274     | 2ydo   | 3zev                         | 19.5                    | Galaxy                             | 36.6                                | 5.8             | 4.2        | 4.1           | 3.3                    | 9.5               | 6.4        | 4.8           | 6.4       |
| P29274     | 2ydv   | 3zev                         | 19.5                    | Galaxy                             | 36.7                                | 5.9             | 4.6        | 4.7           | 4.6                    | 3.8               | 8.9        | 3.8           | 11.4      |
| P29274     | 4ug2   | 3zev                         | 19.5                    | Galaxy                             | 37.5                                | 8.6             | 7.9        | 6.6           | 9.3                    | 5.4               | 3.6        | 6.3           | 2.7       |
| P29274     | 3qak   | 3zev                         | 19.5                    | Galaxy                             | 36.9                                | 10.0            | 9.3        | 8.5           | 10.2                   | 11.9              | 4.5        | 6.7           | 3.7       |
| P29274     | 3eml   | 3zev                         | 19.5                    | Galaxy                             | 48.6                                | 7.5             | 9.3        | 5.7           | 8.6                    | 6.7               | 2.7        | 6.7           | 4.0       |
| P32300     | 4n6h   | 4ea3                         | 59.2                    | Galaxy                             | 64.0                                | 3.9             | 4.4        | 5.7           | 4.4                    | 22.6              | 11.3       | 4.8           | 14.5      |
| P34998     | 4k5y   | 4l6r                         | 33.5                    | Galaxy                             | 45.7                                | 17.4            | 18.7       | 19.1          | 18.5                   | 0.0               | 1.7        | 0.0           | 1.7       |
| P35367     | 3rze   | 4iaq                         | 36.7                    | Galaxy                             | 57.8                                | 5.3             | 7.2        | 7.5           | 7.6                    | 11.8              | 15.8       | 9.2           | 14.5      |
| P35462     | 3pbl   | 2ycw                         | 37.9                    | Galaxy                             | 62.0                                | 1.9             | 3.2        | 3.2           | 3.3                    | 31.6              | 15.8       | 7.0           | 8.8       |
| P41145     | 4djh   | 4s0v                         | 27.7                    | Galaxy                             | 51.1                                | 6.3             | 4.8        | 7.4           | 6.4                    | 11.4              | 16.5       | 2.5           | 19.0      |
| P41146     | 4ea3   | 4dkl                         | 58.9                    | Galaxy                             | 72.8                                | 4.3             | 2.4        | 3.2           | 4.2                    | 17.9              | 16.1       | 7.1           | 7.1       |
| P41146     | 5dhg   | 4dkl                         | 58.9                    | Galaxy                             | 72.7                                | 3.2             | 4.4        | 3.2           | 3.5                    | 20.6              | 17.8       | 15.1          | 13.7      |
| P41146     | 5dhh   | 4dkl                         | 58.9                    | Galaxy                             | 71.8                                | 2.0             | 2.5        | 2.8           | 2.9                    | 18.2              | 10.9       | 9.1           | 9.1       |
| P41594     | 4oo9   | 4daj                         | 9.2                     | Galaxy                             | 23.8                                | 8.8             | 6.4        | 8.5           | 6.7                    | 1.2               | 1.2        | 3.7           | 2.5       |
| P41594     | 5cgd   | 4daj                         | 9.2                     | Galaxy                             | 23.8                                | 7.7             | 7.2        | 7.4           | 7.8                    | 3.2               | 6.5        | 3.2           | 5.4       |
| P41595     | 4ib4   | 4iaq                         | 31.1                    | Galaxy                             | 54.1                                | 1.8             | 1.3        | 3.1           | 1.4                    | 36.2              | 33.0       | 23.4          | 24.5      |
| P42866     | 5c1m   | 4ea3                         | 59.2                    | Galaxy                             | 47.2                                | 1.1             | 2.0        | 1.6           | 2.2                    | 54.6              | 45.5       | 21.2          | 24.2      |
| P51681     | 4mbs   | 4rwd                         | 25.8                    | Galaxy                             | 52.4                                | 5.1             | 5.1        | 5.2           | 4.1                    | 13.3              | 4.0        | 8.0           | 6.7       |
| P61073     | 3odu   | 4mbs                         | 32.4                    | Galaxy                             | 54.1                                | 3.3             | 4.2        | 3.4           | 5.1                    | 23.3              | 14.0       | 14.0          | 11.6      |
| Q13255     | 4or2   | 4daj                         | 9.4                     | Galaxy                             | 22.4                                | 5.7             | 5.9        | 7.1           | 5.1                    | 4.9               | 1.6        | 3.3           | 1.6       |
| Q99835     | 4jkv   | 2hpy                         | 11.5                    | Galaxy                             | 27.5                                | 12.3            | 7.7        | 14.1          | 12.5                   | 2.2               | 3.2        | 0.0           | 0.0       |
| Q99835     | 4qim   | 2hpy                         | 11.5                    | Galaxy                             | 27.7                                | 8.0             | 8.9        | 12.9          | 9.8                    | 3.7               | 2.5        | 0.0           | 2.5       |
| Q99835     | 4o9r   | 2hpy                         | 11.5                    | Galaxy                             | 28.5                                | 15.7            | 10.8       | 14.7          | 13.3                   | 2.6               | 10.3       | 5.1           | 10.3      |
| Q99835     | 4qin   | 2hpy                         | 11.5                    | Galaxy                             | 27.8                                | 8.1             | 14.2       | 17.9          | 15.2                   | 5.4               | 1.1        | 2.2           | 1.1       |
| Q99835     | 4n4w   | 2hpy                         | 11.5                    | Galaxy                             | 27.9                                | 6.1             | 4.9        | 7.1           | 5.4                    | 11.3              | 10.0       | 5.0           | 6.3       |
| Q9H244     | 4pxz   | 4n6h                         | 22.2                    | Galaxy                             | 38.9                                | 6.4             | 6.5        | 4.5           | 5.8                    | 7.0               | 3.5        | 2.6           | 3.5       |
| Q9H244     | 4ntj   | 4n6h                         | 22.2                    | Galaxy                             | 37.9                                | 7.3             | 8.6        | 7.5           | 8.4                    | 6.9               | 3.5        | 3.5           | 9.2       |
| O43614     | 4s0v   | 4buo                         | 22.5                    | Modeller                           | 60.9                                | 0.7             | 4.0        | 5.2           | 3.4                    | 40.7              | 22.2       | 5.6           | 24.1      |
| P07550     | 2rh1   | 4iaq                         | 35.5                    | Modeller                           | 55.2                                | 3.1             | 6.7        | 3.5           | 2.5                    | 24.6              | 8.7        | 36.2          | 20.3      |
| P07550     | 3ny8   | 4iaq                         | 35.5                    | Modeller                           | 54.1                                | 1.4             | 2.8        | 2.6           | 1.4                    | 50.9              | 20.8       | 26.4          | 60.4      |
| P07550     | 3sn6   | 4iaq                         | 35.5                    | Modeller                           | 57.2                                | 6.6             | 1.9        | 3.0           | 1.8                    | 8.0               | 28.0       | 25.3          | 21.3      |
| P07550     | 4lde   | 4iaq                         | 35.5                    | Modeller                           | 56.9                                | 6.4             | 1.5        | 2.6           | 1.6                    | 11.1              | 32.2       | 27.8          | 27.8      |
| P07550     | 3d4s   | 4iaq                         | 35.5                    | Modeller                           | 54.3                                | 1.9             | 3.5        | 3.1           | 2.0                    | 33.3              | 11.6       | 24.6          | 26.1      |
| P07700     | 3zpr   | 4gbr                         | 59.9                    | Modeller                           | 80.8                                | 1.0             | 1.0        | 0.9           | 3.1                    | 52.7              | 38.2       | 43.6          | 9.1       |
| P07700     | 4amj   | 4gbr                         | 59.9                    | Modeller                           | 80.7                                | 2.4             | 1.1        | 2.2           | 1.5                    | 21.7              | 50.6       | 39.8          | 41.0      |
| P07700     | 4bvn   | 4gbr                         | 59.9                    | Modeller                           | 75.9                                | 0.8             | 1.5        | 1.6           | 1.1                    | 58.2              | 44.8       | 32.8          | 34.3      |
| P07700     | 3zpq   | 4gbr                         | 59.9                    | Modeller                           | 79.5                                | 1.1             | 1.3        | 1.3           | 1.7                    | 52.3              | 25.0       | 31.8          | 29.6      |
| P07700     | 5a8e   | 4gbr                         | 59.9                    | Modeller                           | 75.6                                | 1.3             | 1.3        | 2.7           | 2.8                    | 44.3              | 44.3       | 24.1          | 15.2      |
| P07700     | 2y00   | 4gbr                         | 59.9                    | Modeller                           | 79.4                                | 1.7             | 1.7        | 4.0           | 3.5                    | 39.0              | 22.0       | 20.3          | 13.6      |
| P08172     | 4mq5   | 4ldl                         | 28.0                    | Modeller                           | 58.4                                | 4.1             | 5.2        | 4.8           | 4.6                    | 12.7              | 5.6        | 29.6          | 7.0       |
| P08172     | 3uon   | 4ldl                         | 28.0                    | Modeller                           | 46.1                                | 4.1             | 10.1       | 4.2           | 5.1                    | 9.1               | 1.5        | 16.7          | 16.7      |
| P08483     | 4u15   | 3pds                         | 34.0                    | Modeller                           | 60.3                                | 5.6             | 5.7        | 11.9          | 8.1                    | 16.1              | 12.6       | 0.0           | 8.1       |
| P21453     | 3v2w   | 3rfm                         | 26.6                    | Modeller                           | 53.3                                | 7.0             | 4.4        | 4.9           | 5.9                    | 8.1               | 9.7        | 14.5          | 8.1       |

|        |      |      |      |          |      |      |      |      |      |      |      |      |      |
|--------|------|------|------|----------|------|------|------|------|------|------|------|------|------|
| P25116 | 3vw7 | 4phu | 21.1 | Modeller | 45.8 | 8.9  | 6.7  | 9.2  | 7.9  | 8.6  | 11.1 | 4.9  | 11.1 |
| P28222 | 4iaq | 2rh1 | 36.2 | Modeller | 57.1 | 4.4  | 3.3  | 8.3  | 4.4  | 25.0 | 17.9 | 4.8  | 13.1 |
| P28222 | 4iar | 2rh1 | 36.2 | Modeller | 54.4 | 5.0  | 3.2  | 5.3  | 3.8  | 12.4 | 16.9 | 14.6 | 20.2 |
| P29274 | 2ydo | 3zev | 19.5 | Modeller | 37.6 | 6.0  | 3.6  | 3.7  | 3.7  | 11.1 | 4.8  | 11.1 | 4.8  |
| P29274 | 2ydv | 3zev | 19.5 | Modeller | 37.3 | 5.8  | 4.4  | 4.6  | 4.3  | 5.1  | 5.1  | 3.8  | 3.8  |
| P29274 | 4ug2 | 3zev | 19.5 | Modeller | 37.9 | 8.6  | 8.2  | 8.3  | 7.3  | 5.4  | 6.3  | 5.4  | 8.0  |
| P29274 | 3qak | 3zev | 19.5 | Modeller | 37.7 | 8.3  | 8.3  | 7.7  | 8.5  | 6.7  | 0.1  | 0.0  | 0.1  |
| P29274 | 3eml | 3zev | 19.5 | Modeller | 49.0 | 8.0  | 6.3  | 8.1  | 7.6  | 1.3  | 4.0  | 8.0  | 2.7  |
| P32300 | 4n6h | 4ea3 | 59.2 | Modeller | 64.9 | 4.4  | 4.4  | 4.3  | 4.4  | 14.5 | 21.0 | 6.5  | 11.3 |
| P34998 | 4k5y | 4l6r | 33.5 | Modeller | 46.0 | 16.6 | 19.0 | 17.4 | 18.5 | 3.3  | 0.0  | 1.7  | 0.0  |
| P35367 | 3rze | 4iaq | 36.7 | Modeller | 58.8 | 2.9  | 5.8  | 5.3  | 4.3  | 17.1 | 13.2 | 14.5 | 15.8 |
| P35462 | 3pbl | 2ycw | 37.9 | Modeller | 59.9 | 2.1  | 3.2  | 7.1  | 3.2  | 28.1 | 8.8  | 5.3  | 8.8  |
| P41145 | 4djh | 4s0v | 27.7 | Modeller | 51.6 | 7.0  | 6.1  | 6.1  | 4.3  | 24.1 | 20.3 | 10.1 | 30.4 |
| P41146 | 4ea3 | 4dkl | 58.9 | Modeller | 74.2 | 4.8  | 3.3  | 4.2  | 2.8  | 16.1 | 7.1  | 12.5 | 14.3 |
| P41146 | 5dhg | 4dkl | 58.9 | Modeller | 73.8 | 2.6  | 3.5  | 5.5  | 2.5  | 26.0 | 11.0 | 4.1  | 16.4 |
| P41146 | 5dhh | 4dkl | 58.9 | Modeller | 73.8 | 2.4  | 2.7  | 5.1  | 2.6  | 29.1 | 18.2 | 5.5  | 12.7 |
| P41594 | 4oo9 | 4daj | 9.2  | Modeller | 23.2 | 8.4  | 7.6  | 8.7  | 4.9  | 2.5  | 3.7  | 1.2  | 6.2  |
| P41594 | 5cgd | 4daj | 9.2  | Modeller | 23.3 | 9.5  | 7.4  | 8.7  | 8.2  | 1.1  | 7.5  | 3.2  | 11.8 |
| P41595 | 4ib4 | 4iaq | 31.1 | Modeller | 52.2 | 1.6  | 1.5  | 2.4  | 1.4  | 44.7 | 30.9 | 19.2 | 26.6 |
| P42866 | 5c1m | 4ea3 | 59.2 | Modeller | 46.9 | 1.3  | 1.9  | 4.1  | 1.0  | 30.3 | 57.6 | 12.1 | 57.6 |
| P51681 | 4mbs | 4rwd | 25.8 | Modeller | 52.2 | 5.3  | 5.7  | 4.0  | 5.0  | 16.0 | 5.3  | 13.3 | 8.0  |
| P61073 | 3odu | 4mbs | 32.4 | Modeller | 54.4 | 4.5  | 4.0  | 6.7  | 3.6  | 11.6 | 7.0  | 14.0 | 27.9 |
| Q13255 | 4or2 | 4daj | 9.4  | Modeller | 21.0 | 6.5  | 4.1  | 5.6  | 3.8  | 3.3  | 1.6  | 4.9  | 1.6  |
| Q99835 | 4jkv | 2hpy | 11.5 | Modeller | 28.1 | 13.0 | 13.2 | 13.3 | 13.3 | 0.0  | 5.4  | 0.0  | 3.2  |
| Q99835 | 4qim | 2hpy | 11.5 | Modeller | 27.5 | 12.8 | 8.6  | 9.6  | 12.4 | 1.2  | 2.5  | 3.7  | 3.7  |
| Q99835 | 4o9r | 2hpy | 11.5 | Modeller | 28.6 | 16.1 | 16.1 | 3.9  | 15.6 | 0.0  | 0.0  | 7.7  | 5.1  |
| Q99835 | 4qin | 2hpy | 11.5 | Modeller | 28.6 | 17.2 | 17.4 | 15.8 | 13.7 | 0.0  | 0.0  | 0.0  | 2.2  |
| Q99835 | 4n4w | 2hpy | 11.5 | Modeller | 28.3 | 8.1  | 7.7  | 7.2  | 6.0  | 12.5 | 5.0  | 3.8  | 13.8 |
| Q9H244 | 4pxz | 4n6h | 22.2 | Modeller | 38.4 | 5.2  | 7.0  | 7.0  | 5.3  | 8.8  | 2.6  | 1.8  | 0.9  |
| Q9H244 | 4ntj | 4n6h | 22.2 | Modeller | 37.8 | 6.4  | 8.9  | 10.7 | 9.0  | 5.8  | 2.3  | 0.0  | 1.2  |
| O43614 | 4s0v | 4buo | -    | I-TSSR   | 64.1 | 2.6  | 4.5  | 4.8  | 4.8  | 22.2 | 16.7 | 9.3  | 18.5 |
| P07550 | 2rh1 | 4iaq | -    | I-TSSR   | 95.0 | 0.7  | 1.0  | 2.1  | 0.8  | 68.1 | 53.6 | 27.5 | 56.5 |
| P07550 | 3ny8 | 4iaq | -    | I-TSSR   | 86.4 | 1.6  | 2.4  | 3.0  | 2.3  | 43.4 | 34.0 | 17.0 | 28.3 |
| P07550 | 3sn6 | 4iaq | -    | I-TSSR   | 54.4 | 1.8  | 1.5  | 2.8  | 1.6  | 46.7 | 38.7 | 9.3  | 34.7 |
| P07550 | 4lde | 4iaq | -    | I-TSSR   | 60.5 | 1.4  | 1.5  | 2.7  | 1.6  | 48.9 | 35.6 | 10.0 | 28.9 |
| P07550 | 3d4s | 4iaq | -    | I-TSSR   | 88.9 | 1.0  | 1.2  | 2.6  | 0.7  | 58.0 | 53.6 | 17.4 | 55.1 |
| P08172 | 4mq5 | 4ldl | -    | I-TSSR   | 56.9 | 4.5  | 10.5 | 5.4  | 2.5  | 14.1 | 2.8  | 2.8  | 12.7 |
| P08172 | 3uon | 4ldl | -    | I-TSSR   | 91.5 | 2.5  | 11.1 | 2.3  | 0.8  | 21.2 | 1.5  | 15.2 | 68.2 |
| P21453 | 3v2w | 3rfm | -    | I-TSSR   | 92.3 | 3.1  | 5.9  | 5.7  | 2.7  | 25.0 | 7.4  | 10.3 | 36.8 |
| P25116 | 3vw7 | 4phu | -    | I-TSSR   | 97.4 | 10.7 | 11.9 | 8.5  | 10.1 | 6.2  | 2.5  | 1.2  | 22.2 |
| P28222 | 4iaq | 2rh1 | -    | I-TSSR   | 90.1 | 4.3  | 4.3  | 2.7  | 3.7  | 17.9 | 17.9 | 26.2 | 33.3 |
| P28222 | 4iar | 2rh1 | -    | I-TSSR   | 94.8 | 4.2  | 4.2  | 2.4  | 3.6  | 18.0 | 14.6 | 18.0 | 32.6 |
| P29274 | 2ydo | 3zev | -    | I-TSSR   | 56.9 | 3.1  | 3.7  | 2.4  | 0.0  | 27.0 | 31.8 | 36.5 | 0.0  |
| P29274 | 2ydv | 3zev | -    | I-TSSR   | 56.5 | 3.4  | 4.9  | 2.0  | 3.0  | 22.8 | 17.7 | 31.7 | 38.0 |
| P29274 | 4ug2 | 3zev | -    | I-TSSR   | 59.9 | 4.2  | 2.7  | 3.7  | 3.0  | 13.4 | 28.6 | 15.2 | 30.4 |
| P29274 | 3qak | 3zev | -    | I-TSSR   | 59.0 | 3.1  | 4.0  | 2.5  | 6.1  | 27.6 | 18.7 | 39.6 | 14.2 |
| P29274 | 3eml | 3zev | -    | I-TSSR   | 81.1 | 3.9  | 3.0  | 2.5  | 2.0  | 33.3 | 16.0 | 30.7 | 36.0 |
| P35367 | 3rze | 4iaq | -    | I-TSSR   | 98.5 | 2.9  | 2.6  | 0.8  | 3.0  | 21.1 | 27.6 | 39.5 | 18.4 |
| P35462 | 3pbl | 2ycw | -    | I-TSSR   | 97.8 | 8.1  | 10.8 | 9.7  | 3.8  | 5.3  | 3.5  | 1.8  | 21.1 |
| P41145 | 4djh | 4s0v | -    | I-TSSR   | 91.6 | 6.1  | 5.1  | 3.7  | 5.3  | 24.4 | 16.7 | 11.5 | 14.1 |
| P41146 | 4ea3 | 4dkl | -    | I-TSSR   | 88.4 | 5.8  | 5.9  | 5.9  | 4.3  | 7.1  | 5.4  | 3.6  | 3.6  |
| P41146 | 5dhg | 4dkl | -    | I-TSSR   | 86.9 | 3.7  | 5.4  | 5.5  | 4.9  | 8.2  | 4.1  | 8.2  | 5.5  |
| P41146 | 5dhh | 4dkl | -    | I-TSSR   | 85.6 | 3.2  | 5.1  | 6.7  | 5.1  | 12.7 | 9.1  | 10.9 | 7.3  |
| P41595 | 4ib4 | 4iaq | -    | I-TSSR   | 89.5 | 1.7  | 1.6  | 2.7  | 1.1  | 28.7 | 33.0 | 14.9 | 39.4 |
| P51681 | 4mbs | 4rwd | -    | I-TSSR   | 97.5 | 5.4  | 2.6  | 6.5  | 2.4  | 20.0 | 28.0 | 6.7  | 17.3 |
| P61073 | 3odu | 4mbs | -    | I-TSSR   | 91.3 | 7.5  | 8.7  | 6.8  | 8.6  | 6.7  | 4.4  | 17.8 | 20.0 |
| Q99835 | 4jkv | 2hpy | -    | I-TSSR   | 90.2 | 5.8  | 1.5  | 8.6  | 2.6  | 18.9 | 53.3 | 17.8 | 34.4 |
| Q99835 | 4qim | 2hpy | -    | I-TSSR   | 85.7 | 8.4  | 5.3  | 5.7  | 6.4  | 17.5 | 20.0 | 18.8 | 22.5 |
| Q99835 | 4o9r | 2hpy | -    | I-TSSR   | 81.9 | 10.5 | 8.4  | 10.5 | 7.0  | 0.0  | 5.1  | 12.8 | 15.4 |
| Q99835 | 4qin | 2hpy | -    | I-TSSR   | 84.4 | 9.6  | 8.0  | 9.8  | 8.0  | 5.4  | 6.5  | 7.5  | 5.4  |
| Q99835 | 4n4w | 2hpy | -    | I-TSSR   | 94.8 | 7.7  | 6.7  | 6.1  | 3.8  | 3.9  | 3.9  | 6.4  | 20.5 |
| Q9H244 | 4pxz | 4n6h | -    | I-TSSR   | 87.6 | 1.3  | 2.5  | 1.4  | 2.2  | 56.1 | 29.0 | 54.4 | 35.1 |
| Q9H244 | 4ntj | 4n6h | -    | I-TSSR   | 69.1 | 6.2  | 6.6  | 6.9  | 6.8  | 8.1  | 8.1  | 17.2 | 18.4 |
| Mean   | -    | -    | 33.0 | -        | 59.7 | 5.2  | 5.4  | 6.1  | 5.1  | 20.4 | 15.5 | 13.0 | 16.8 |
| Median | -    | -    | 31.8 | -        | 56.9 | 4.5  | 4.6  | 5.3  | 4.3  | 16.1 | 11.2 | 9.1  | 13.8 |

<sup>a</sup>PDB ID of the template GPCR used for model building with GalaxyTBM and MODELLER

<sup>b</sup>Sequence identity of the input GPCR and the selected template

<sup>c</sup>Model building method used for each input structure; 'Galaxy' for GalaxyTBM (1), 'Modeller' for MODELLER (2), and 'I-TASSR' for GPCR-I-TASSER (3).

<sup>d</sup>GDT-HA of the input GPCR structure

<sup>e</sup>AutoDock Vina (4) applied to input GPCR structures with manually assigned flexible sidechains. Among the predicted binding pocket residues, sidechains placed inside the grid box were selected as flexible sidechains with restraints on the sum of the number of side chain torsion angles  $\leq 32$ .



|        |      |      |      |          |       |       |       |        |       |       |       |       |       |       |
|--------|------|------|------|----------|-------|-------|-------|--------|-------|-------|-------|-------|-------|-------|
| P29274 | 3eml | 3zev | 19.5 | Modeller | 49.04 | 1.22  | 1.31  | 3.93   | 7.00  | 7.57  | 10.47 | 0.01  | 0.01  | 0.14  |
| P32300 | 4n6h | 4ea3 | 59.2 | Modeller | 64.9  | 1.02  | -0.26 | -2.4   | 7.23  | 2.04  | 4.52  | 0.05  | 0.02  | -0.35 |
| P34998 | 4k5y | 4l6r | 33.5 | Modeller | 45.95 | 1.22  | 0.71  | -1.42  | 6.04  | 2.70  | 4.04  | 0.03  | 0.06  | 0.15  |
| P35367 | 3rze | 4iaq | 36.7 | Modeller | 58.77 | 0.93  | 0.65  | -1.49  | 6.71  | 4.32  | 6.1   | 0.05  | 0.05  | -0.04 |
| P35462 | 3pbl | 2ycw | 37.9 | Modeller | 59.93 | 2.11  | 1.29  | 3.03   | 7.14  | 3.46  | 7.31  | 0.02  | 0.03  | -0.01 |
| P41145 | 4djh | 4s0v | 27.7 | Modeller | 51.57 | 1.92  | 1.48  | -0.44  | 8.57  | 3.29  | 5.82  | 0.05  | 0.05  | 0.11  |
| P41146 | 4ea3 | 4dkl | 58.9 | Modeller | 74.19 | 2.43  | 2.25  | -2.7   | 7.44  | 3.91  | 6.03  | 0.04  | 0.05  | 0.04  |
| P41146 | 5dhg | 4dkl | 58.9 | Modeller | 73.84 | 1.96  | 1.87  | -3.46  | 6.41  | 2.16  | 4.69  | 0.04  | 0.04  | 0.01  |
| P41146 | 5dhh | 4dkl | 58.9 | Modeller | 73.84 | 2.24  | 2.14  | -3.05  | 7.99  | 3.34  | 5.25  | 0.04  | 0.06  | 0.02  |
| P41594 | 4oo9 | 4daj | 9.2  | Modeller | 23.16 | 1.19  | 0.97  | 1.41   | 2.49  | 2.25  | 2.65  | 0.06  | 0.05  | 0.31  |
| P41594 | 5cgd | 4daj | 9.2  | Modeller | 23.3  | 1.06  | 0.85  | 1.27   | 2.49  | 2.28  | 2.94  | 0.04  | 0.02  | 0.33  |
| P41595 | 4ib4 | 4iaq | 31.1 | Modeller | 52.17 | 1.08  | 1.53  | 0.00   | 8.67  | 6.92  | 7.26  | 0.03  | 0.01  | 0.28  |
| P42866 | 5c1m | 4ea3 | 59.2 | Modeller | 46.93 | 1.27  | 0.99  | -0.36  | 5.17  | 2.60  | 3.57  | 0.02  | 0.00  | 0.19  |
| P51681 | 4mbs | 4rwd | 25.8 | Modeller | 52.18 | 1.04  | 0.34  | 5.75   | 10.33 | 7.13  | 13.04 | 0.04  | 0.05  | 0.25  |
| P61073 | 3odu | 4mbs | 32.4 | Modeller | 54.39 | 0.95  | 0.57  | 0.67   | 5.61  | 5.21  | 5.08  | 0.05  | 0.05  | 0.05  |
| Q13255 | 4or2 | 4daj | 9.4  | Modeller | 21.04 | 0.71  | 0.4   | 0.6    | 2.32  | 2.09  | 1.12  | 0.03  | 0.01  | 0.58  |
| Q99835 | 4jkv | 2hpy | 11.5 | Modeller | 28.09 | 1.31  | 1.39  | 0.09   | 2.98  | 2.61  | 3.36  | 0.04  | 0.02  | 0.30  |
| Q99835 | 4qim | 2hpy | 11.5 | Modeller | 27.46 | 1.27  | 1.35  | 0.48   | 2.34  | 2.08  | 2.05  | 0.04  | 0.01  | 0.37  |
| Q99835 | 4o9r | 2hpy | 11.5 | Modeller | 28.55 | 1.4   | 1.07  | -0.42  | 2.82  | 2.3   | 2.66  | 0.05  | 0.01  | 0.46  |
| Q99835 | 4qin | 2hpy | 11.5 | Modeller | 28.64 | 0.97  | 0.97  | -0.24  | 1.66  | 1.62  | 2.23  | 0.04  | 0.03  | 0.47  |
| Q99835 | 4n4w | 2hpy | 11.5 | Modeller | 28.26 | 1.55  | 1.38  | 0.16   | 2.42  | 1.32  | 2.07  | 0.03  | 0.02  | 0.42  |
| Q9H244 | 4pxz | 4n6h | 22.2 | Modeller | 38.43 | 1.52  | 1.52  | -0.18  | 4.05  | 2.94  | 2.11  | 0.07  | 0.04  | 0.52  |
| Q9H244 | 4ntj | 4n6h | 22.2 | Modeller | 37.83 | 2.13  | 1.86  | 2.78   | 5.19  | 3.24  | 3.46  | 0.08  | 0.07  | 0.26  |
| O43614 | 4s0v | 4buo | -    | I-TSSR   | 64.06 | 0.26  | 1.24  | 0.44   | 7.19  | 7.64  | 7.92  | 0.03  | 0.05  | -0.13 |
| P07550 | 2rh1 | 4iaq | -    | I-TSSR   | 95.02 | -1.55 | -2.24 | -19.33 | 1.33  | -8.89 | -8.33 | -0.02 | -0.02 | -0.03 |
| P07550 | 3ny8 | 4iaq | -    | I-TSSR   | 86.41 | -1.04 | -2.00 | -15.5  | 1.65  | -7.84 | -6.59 | -0.02 | -0.02 | 0.02  |
| P07550 | 3sn6 | 4iaq | -    | I-TSSR   | 54.44 | 0.35  | 0.26  | -5.4   | 0.20  | -4.42 | -3.00 | -0.04 | -0.05 | 0.02  |
| P07550 | 4lde | 4iaq | -    | I-TSSR   | 60.53 | 0.00  | 0.00  | -5.44  | -0.02 | -4.09 | -1.44 | -0.02 | -0.03 | 0.1   |
| P07550 | 3d4s | 4iaq | -    | I-TSSR   | 88.94 | -0.70 | -0.70 | -17.34 | 2.22  | -5.9  | -5.96 | -0.01 | -0.02 | -0.01 |
| P08172 | 4mq5 | 4ldl | -    | I-TSSR   | 56.86 | 1.44  | 1.26  | -3.52  | 2.86  | -0.27 | -1.47 | 0.06  | 0.04  | -0.28 |
| P08172 | 3uon | 4ldl | -    | I-TSSR   | 91.48 | -1.25 | -1.25 | -20.53 | 4.20  | 0.91  | -2.93 | 0.02  | 0.01  | 0.07  |
| P21453 | 3v2w | 3rfm | -    | I-TSSR   | 92.31 | -2.91 | -1.76 | -14.31 | 2.51  | -0.76 | -2.05 | 0.00  | 0.01  | -0.32 |
| P25116 | 3vw7 | 4phu | -    | I-TSSR   | 97.41 | -1.79 | -2.05 | -14.02 | 13.1  | 10.04 | 6.98  | 0.01  | 0.01  | -0.03 |
| P28222 | 4iaq | 2rh1 | -    | I-TSSR   | 90.07 | -1.74 | -2.26 | -12.54 | -0.79 | -5.86 | -6.36 | -0.06 | -0.04 | -0.63 |
| P28222 | 4iar | 2rh1 | -    | I-TSSR   | 94.76 | -2.76 | -2.57 | -13.14 | 0.67  | -6.11 | -5.69 | -0.07 | -0.06 | -0.38 |
| P29274 | 2ydo | 3zev | -    | I-TSSR   | 56.9  | 0.76  | 0.17  | 0.42   | 5.38  | 5.76  | 5.53  | 0.02  | 0.02  | -0.23 |
| P29274 | 2ydv | 3zev | -    | I-TSSR   | 56.54 | 0.33  | 0.00  | -0.50  | 4.95  | 6.22  | 5.44  | 0.02  | 0.00  | -0.16 |
| P29274 | 4ug2 | 3zev | -    | I-TSSR   | 59.93 | -0.08 | 0.09  | -0.09  | 5.19  | 6.62  | 4.94  | 0.02  | 0.01  | 0.04  |
| P29274 | 3qak | 3zev | -    | I-TSSR   | 59.03 | 0.45  | 0.09  | -2.19  | 7.46  | 8.26  | 7.39  | 0.01  | -0.01 | -0.19 |
| P29274 | 3eml | 3zev | -    | I-TSSR   | 81.14 | -2.08 | -1.21 | -9.26  | 10.2  | 10.31 | 4.62  | -0.02 | -0.02 | -0.3  |
| P35367 | 3rze | 4iaq | -    | I-TSSR   | 98.51 | -4.48 | -3.64 | -14.84 | -0.12 | -5.88 | -3.03 | -0.14 | -0.13 | -0.54 |
| P35462 | 3pbl | 2ycw | -    | I-TSSR   | 97.78 | -2.03 | -1.47 | -22.13 | 3.94  | -4.42 | -     | -0.14 | -0.13 | -1.19 |
| P41145 | 4djh | 4s0v | -    | I-TSSR   | 91.61 | -2.36 | -1.49 | -9.7   | 8.47  | 0.03  | 2.4   | -0.06 | -0.05 | -0.18 |
| P41146 | 4ea3 | 4dkl | -    | I-TSSR   | 88.4  | -1.44 | -1.53 | -5.94  | 4.06  | -1.27 | 2.97  | -0.05 | -0.04 | -0.17 |
| P41146 | 5dhg | 4dkl | -    | I-TSSR   | 86.92 | -0.8  | -0.62 | -6.58  | 4.64  | -0.06 | 2.01  | -0.04 | -0.03 | -0.15 |
| P41146 | 5dhh | 4dkl | -    | I-TSSR   | 85.55 | 0.53  | 0.27  | -5.58  | 5.43  | -0.62 | 1.59  | -0.02 | -0.01 | -0.17 |
| P41595 | 4ib4 | 4iaq | -    | I-TSSR   | 89.53 | -0.18 | -1.06 | -8.98  | 13.37 | 10.72 | 9.04  | -0.01 | -0.02 | -0.2  |
| P51681 | 4mbs | 4rwd | -    | I-TSSR   | 97.48 | -3.56 | -2.95 | -13.71 | 1.46  | -2.68 | -4.39 | -0.14 | -0.11 | -0.50 |
| P61073 | 3odu | 4mbs | -    | I-TSSR   | 91.27 | -4.58 | -4.41 | -26.61 | 6.35  | 2.54  | -6.70 | -0.04 | -0.04 | -3.08 |
| Q99835 | 4jkv | 2hpy | -    | I-TSSR   | 90.24 | -1.22 | -1.06 | -10.81 | -4.68 | -8.80 | -7.23 | -0.03 | -0.03 | -0.23 |
| Q99835 | 4qim | 2hpy | -    | I-TSSR   | 85.69 | -0.48 | -0.48 | -3.94  | -3.10 | -6.54 | -4.6  | -0.01 | -0.02 | -0.14 |
| Q99835 | 4o9r | 2hpy | -    | I-TSSR   | 81.9  | -0.42 | -0.92 | -7.24  | -6.83 | -8.94 | -6.61 | -0.03 | -0.03 | -0.10 |
| Q99835 | 4qin | 2hpy | -    | I-TSSR   | 84.41 | 0.00  | -0.33 | -9.00  | -6.50 | -9.72 | -6.47 | -0.01 | -0.02 | -0.09 |
| Q99835 | 4n4w | 2hpy | -    | I-TSSR   | 94.79 | -1.63 | -1.71 | -9.37  | -6.20 | -7.18 | -6.96 | -0.01 | -0.03 | -0.50 |
| Q9H244 | 4pxz | 4n6h | -    | I-TSSR   | 87.63 | -2.54 | -1.75 | -7.72  | 4.20  | 4.55  | 1.39  | -0.06 | -0.03 | -0.19 |
| Q9H244 | 4ntj | 4n6h | -    | I-TSSR   | 69.12 | -1.02 | -1.20 | -5.51  | 2.02  | 1.22  | 0.49  | 0.00  | -0.01 | -0.15 |
| Mean   | -    | -    | 33.0 | -        | 59.7  | 0.71  | 0.59  | -2.21  | 6.04  | 3.91  | 4.50  | 0.02  | 0.02  | 0.00  |
| Median | -    | -    | 31.8 | -        | 56.9  | 1.16  | 0.97  | -0.24  | 6.41  | 4.69  | 4.94  | 0.03  | 0.02  | 0.04  |

<sup>a</sup>PDB ID of the template GPCR used for model building with GalaxyTBM and MODELLER

<sup>b</sup>Sequence identity of the input GPCR and the selected template

<sup>c</sup>Model building method used for each input structure; 'Galaxy' for GalaxyTBM (1), 'Modeller' for MODELLER (2), and 'I-TSSR' for GPCR-I-TASSER (3).

<sup>d</sup>GDT-HA of the input GPCR structure

<sup>e-g</sup>The results were evaluated by applying the LGA method as used in CASP (5,6)

<sup>h</sup>Results of applying GalaxyRefine (7,8). The number of conformations generated was 120 for each target and the 10 lowest refinement energy structures were selected for evaluation.

<sup>i</sup>Results of applying MPrelax (9). The number of conformations generated was 120 for each target and the 10 lowest score structures were selected for evaluation. In addition to the given Rosetta protocol to run MPrelax, atom-pair constraints with weight 1.0 were applied to prevent drift-away from the input structure.



|        |      |      |      |          |       |       |       |        |        |        |        |       |       |       |
|--------|------|------|------|----------|-------|-------|-------|--------|--------|--------|--------|-------|-------|-------|
| P29274 | 3eml | 3zev | 19.5 | Modeller | 58.3  | 2.08  | 2.08  | 4.17   | 11.82  | 11.97  | 15.46  | -0.29 | -0.04 | 0.64  |
| P32300 | 4n6h | 4ea3 | 59.2 | Modeller | 82.7  | 5.77  | 3.85  | 1.93   | 8.94   | -6.52  | 5.60   | 0.03  | 0.02  | -1.10 |
| P34998 | 4k5y | 4l6r | 33.5 | Modeller | 77.1  | 2.08  | 0.00  | 0.00   | 5.79   | 2.48   | 5.46   | 0.04  | 0.03  | 0.44  |
| P35367 | 3rze | 4iaq | 36.7 | Modeller | 78.6  | 1.79  | -1.79 | 3.57   | 2.34   | -11.95 | 5.97   | 0.57  | 0.43  | 0.94  |
| P35462 | 3pbl | 2ycw | 37.9 | Modeller | 82.1  | 0.00  | 0.00  | -1.78  | 5.06   | -10.52 | 1.03   | 0.11  | 0.09  | 0.03  |
| P41145 | 4djh | 4s0v | 27.7 | Modeller | 76.3  | 1.25  | 1.25  | 0.00   | 9.67   | -7.37  | 1.44   | 0.09  | 0.06  | 0.21  |
| P41146 | 4ea3 | 4dkl | 58.9 | Modeller | 87.5  | 1.56  | 0.00  | 1.56   | 6.37   | -9.32  | 2.84   | 0.22  | 0.19  | 0.07  |
| P41146 | 5dhg | 4dkl | 58.9 | Modeller | 89.3  | 0.00  | 0.00  | -1.79  | 4.55   | -10.91 | 2.73   | 0.15  | 0.23  | 0.25  |
| P41146 | 5dhh | 4dkl | 58.9 | Modeller | 84.4  | 3.12  | 1.56  | 3.12   | 0.34   | -7.16  | 7.05   | 0.52  | 0.48  | 0.42  |
| P41594 | 4oo9 | 4daj | 9.2  | Modeller | 32.5  | 3.75  | 3.75  | 8.75   | 5.13   | 3.21   | 2.99   | 0.53  | 0.59  | 1.99  |
| P41594 | 5cgd | 4daj | 9.2  | Modeller | 39.5  | 2.64  | 2.64  | 5.27   | 4.55   | 5.85   | 2.21   | 1.08  | 1.22  | 3.02  |
| P41595 | 4ib4 | 4iaq | 31.1 | Modeller | 75.0  | 3.00  | 3.00  | 1.00   | 11.31  | -1.18  | 7.27   | 0.04  | 0.07  | 0.32  |
| P42866 | 5c1m | 4ea3 | 59.2 | Modeller | 75.0  | 2.50  | 0.00  | 0.00   | 14.36  | 7.63   | 6.00   | 0.28  | -0.04 | 0.47  |
| P51681 | 4mbs | 4rwd | 25.8 | Modeller | 63.2  | 2.63  | 1.31  | 6.58   | 10.20  | 9.90   | 16.16  | -0.04 | 0.08  | -0.61 |
| P61073 | 3odu | 4mbs | 32.4 | Modeller | 88.6  | 2.27  | 2.27  | 2.27   | 20.66  | -1.49  | 20.50  | 0.14  | 0.16  | 0.29  |
| Q13255 | 4or2 | 4daj | 9.4  | Modeller | 35.7  | 1.19  | 0.00  | 1.19   | 2.88   | 1.35   | 1.73   | 1.01  | 1.36  | 2.39  |
| Q99835 | 4jkv | 2hpy | 11.5 | Modeller | 31.6  | 1.31  | 1.31  | 2.63   | -1.15  | -0.86  | -1.63  | -0.04 | -0.06 | 12.25 |
| Q99835 | 4qim | 2hpy | 11.5 | Modeller | 35.9  | 1.56  | 3.12  | 3.12   | 2.39   | 1.26   | 0.34   | 0.54  | 0.53  | 0.15  |
| Q99835 | 4o9r | 2hpy | 11.5 | Modeller | 25.0  | 3.85  | 3.84  | 7.70   | 0.70   | 1.95   | 3.77   | -0.42 | 0.14  | 0.27  |
| Q99835 | 4qin | 2hpy | 11.5 | Modeller | 32.1  | 0.00  | 0.00  | 0.00   | 0.14   | 1.95   | -0.14  | 1.37  | 1.46  | 1.74  |
| Q99835 | 4n4w | 2hpy | 11.5 | Modeller | 41.7  | 2.38  | 3.57  | 2.38   | 1.21   | -3.47  | 0.60   | -0.13 | 3.64  | 4.92  |
| Q9H244 | 4pxz | 4n6h | 22.2 | Modeller | 47.8  | 0.00  | -1.09 | -1.09  | 5.69   | 4.98   | 9.48   | 5.00  | 0.32  | 6.13  |
| Q9H244 | 4ntj | 4n6h | 22.2 | Modeller | 54.7  | 1.56  | 1.56  | 0.00   | 7.16   | 2.73   | 5.11   | 1.02  | 0.57  | 1.57  |
| O43614 | 4s0v | 4buo | -    | I-TSSR   | 80.3  | 2.62  | 3.94  | 2.63   | 10.00  | 11.82  | 5.15   | 0.36  | 0.38  | 0.36  |
| P07550 | 2rh1 | 4iaq | -    | I-TSSR   | 100.0 | 0.00  | -1.47 | -2.94  | 3.21   | -15.61 | 0.11   | -0.07 | -0.13 | -0.24 |
| P07550 | 3ny8 | 4iaq | -    | I-TSSR   | 96.2  | 0.00  | -3.85 | -5.77  | 3.78   | -20.70 | -4.33  | 0.00  | -0.10 | -0.23 |
| P07550 | 3sn6 | 4iaq | -    | I-TSSR   | 85.3  | 1.47  | 1.47  | -0.01  | 11.17  | 1.95   | 2.21   | 0.09  | 0.09  | -0.01 |
| P07550 | 4lde | 4iaq | -    | I-TSSR   | 84.7  | 2.78  | 1.39  | 0.00   | 8.99   | -3.21  | 6.63   | 0.04  | 0.13  | 0.07  |
| P07550 | 3d4s | 4iaq | -    | I-TSSR   | 98.5  | 0.00  | 0.00  | -4.41  | 4.71   | -17.65 | -0.32  | 0.03  | -0.03 | -0.21 |
| P08172 | 4mq5 | 4ldl | -    | I-TSSR   | 78.6  | 1.79  | 1.79  | -3.57  | -2.24  | -8.53  | -9.79  | 0.08  | 0.17  | -0.54 |
| P08172 | 3uon | 4ldl | -    | I-TSSR   | 100.0 | 0.00  | 0.00  | -8.82  | 11.87  | -2.43  | 4.72   | -0.07 | -0.11 | -0.56 |
| P21453 | 3v2w | 3rfm | -    | I-TSSR   | 100.0 | -1.39 | 0.00  | -8.33  | 11.31  | 1.31   | 0.20   | -0.10 | -0.07 | -0.41 |
| P25116 | 3vw7 | 4phu | -    | I-TSSR   | 100.0 | -2.38 | -1.19 | -15.48 | 24.34  | 23.94  | 21.31  | -0.11 | -0.10 | -0.51 |
| P28222 | 4iaq | 2rh1 | -    | I-TSSR   | 100.0 | 0.00  | -1.25 | -11.25 | -1.15  | -11.58 | -12.05 | -0.06 | -0.10 | -0.54 |
| P28222 | 4iar | 2rh1 | -    | I-TSSR   | 98.8  | 0.00  | -1.19 | -13.09 | 4.36   | -11.00 | -7.09  | -0.06 | -0.11 | -0.62 |
| P29274 | 2ydo | 3zev | -    | I-TSSR   | 84.6  | 0.00  | 0.00  | 0.00   | 5.04   | 6.30   | 11.89  | 0.01  | -0.04 | 0.16  |
| P29274 | 2ydv | 3zev | -    | I-TSSR   | 88.3  | 0.00  | -1.67 | 0.00   | 0.24   | 2.06   | 6.30   | -0.03 | -0.11 | 0.19  |
| P29274 | 4ug2 | 3zev | -    | I-TSSR   | 82.9  | 1.32  | 1.32  | -1.31  | 1.41   | 5.15   | 13.54  | 0.11  | 0.03  | 0.20  |
| P29274 | 3qak | 3zev | -    | I-TSSR   | 76.1  | 0.00  | 1.08  | 2.17   | 10.12  | 6.40   | 11.30  | 0.08  | 0.04  | 0.23  |
| P29274 | 3eml | 3zev | -    | I-TSSR   | 97.9  | 0.00  | -2.09 | -4.17  | 22.42  | 8.48   | 10.76  | 0.02  | 0.02  | -0.18 |
| P35367 | 3rze | 4iaq | -    | I-TSSR   | 100.0 | 0.00  | 0.00  | -1.78  | 19.74  | 0.52   | 25.97  | -0.07 | -0.18 | -0.22 |
| P35462 | 3pbl | 2ycw | -    | I-TSSR   | 91.1  | -1.79 | -1.79 | -5.35  | 10.26  | -11.17 | 2.86   | -0.13 | -0.21 | -0.39 |
| P41145 | 4djh | 4s0v | -    | I-TSSR   | 97.4  | 0.00  | -2.63 | -2.63  | 16.16  | -3.23  | 16.67  | -0.02 | -0.04 | -0.08 |
| P41146 | 4ea3 | 4dkl | -    | I-TSSR   | 98.4  | -3.13 | -3.13 | -6.25  | 8.18   | 1.82   | 8.86   | -0.09 | -0.07 | -0.16 |
| P41146 | 5dhg | 4dkl | -    | I-TSSR   | 100.0 | -1.78 | -1.78 | -7.14  | 10.65  | 6.75   | 17.79  | -0.08 | -0.07 | -0.16 |
| P41146 | 5dhh | 4dkl | -    | I-TSSR   | 96.9  | 0.00  | 0.00  | -4.69  | 17.95  | 8.29   | 16.59  | -0.04 | -0.04 | -0.14 |
| P41595 | 4ib4 | 4iaq | -    | I-TSSR   | 97.0  | 2.00  | 0.00  | -3.00  | 6.56   | -1.35  | 3.24   | 0.01  | -0.03 | -0.12 |
| P51681 | 4mbs | 4rwd | -    | I-TSSR   | 97.4  | 0.00  | -1.32 | -13.16 | -1.01  | -1.82  | -7.27  | -0.13 | -0.14 | -0.79 |
| P61073 | 3odu | 4mbs | -    | I-TSSR   | 100.0 | -2.08 | -4.17 | -12.50 | 14.39  | -0.61  | 2.88   | -0.12 | -0.19 | -0.82 |
| Q99835 | 4jkv | 2hpy | -    | I-TSSR   | 95.8  | 1.39  | 1.39  | -2.77  | -23.63 | -30.81 | -20.00 | 0.00  | -0.02 | -0.15 |
| Q99835 | 4qim | 2hpy | -    | I-TSSR   | 93.3  | 0.00  | 0.00  | 0.00   | -18.18 | -23.76 | -23.64 | 0.01  | 0.01  | -0.05 |
| Q99835 | 4o9r | 2hpy | -    | I-TSSR   | 82.7  | 7.69  | 9.62  | 5.77   | -28.12 | -26.72 | -18.33 | 0.15  | 0.16  | 0.01  |
| Q99835 | 4qin | 2hpy | -    | I-TSSR   | 96.4  | 0.00  | 0.00  | 0.00   | -9.79  | -14.13 | -4.89  | 0.04  | 0.02  | 0.01  |
| Q99835 | 4n4w | 2hpy | -    | I-TSSR   | 98.8  | 0.00  | 0.00  | 0.00   | -12.28 | -14.00 | -15.37 | 0.01  | 0.02  | -0.03 |
| Q9H244 | 4pxz | 4n6h | -    | I-TSSR   | 100.0 | -2.17 | -3.26 | -8.69  | 12.41  | 11.31  | 11.23  | -0.08 | -0.06 | -0.21 |
| Q9H244 | 4ntj | 4n6h | -    | I-TSSR   | 84.4  | 0.00  | 0.00  | 0.00   | 10.34  | 8.75   | 11.02  | 0.02  | 0.00  | 0.14  |
| Mean   | -    | -    | 33.0 | -        | 74.6  | 1.76  | 1.18  | 0.68   | 7.71   | -0.16  | 5.94   | 0.24  | 0.23  | 0.51  |
| Median | -    | -    | 31.8 | -        | 78.6  | 1.56  | 1.31  | 1.47   | 8.49   | 1.31   | 5.94   | 0.06  | 0.04  | 0.16  |

<sup>a</sup>PDB ID of the template GPCR used for model building with GalaxyTBM and MODELLER

<sup>b</sup>Sequence identity of the input GPCR and the selected template

<sup>c</sup>Model building method used for each input structure; 'Galaxy' for GalaxyTBM (1), 'Modeller' for MODELLER (2), and 'I-TSSR' for GPCR-I-TASSER (3)

<sup>d</sup>GDT-HA of the input GPCR structure



<sup>e-g</sup>The results were evaluated by applying LGA method as used in CASP (5,6)

<sup>h</sup>Results of applying GalaxyRefine (7,8). The number of conformations generated was 120 for each target and the 10 lowest refinement energy structures were selected for evaluation.

<sup>i</sup>Results of applying MPrelex (9). The number of conformations generated was 120 for each target and the 10 lowest score structures were selected for evaluation. In addition to the given Rosetta protocol to run MPrelex, atom-pair constraints with weight 1.0 were applied to prevent drift-away from the input structure.

**Figure S1.** Ligand RMSD of the complex structures predicted by Galaxy7TM versus the sequence identity of the query to the template GPCR. Blue dots marked as A–G represent the specific targets explained in detail in Figure S2. Only the targets with input structure generated using GalaxyTBM or MODELLER are shown.

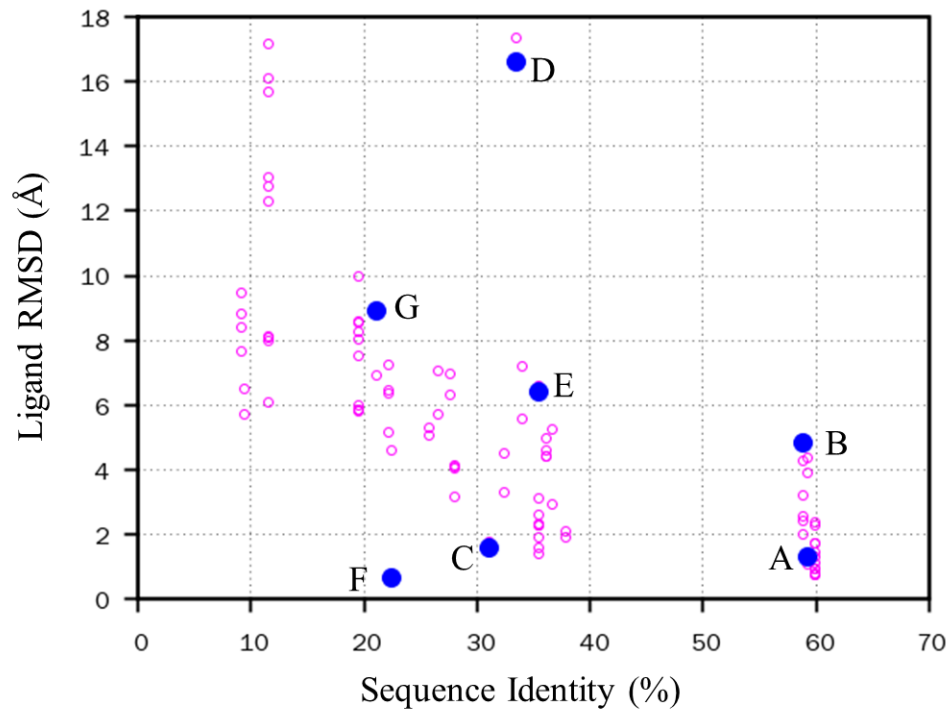

**Figure S2.** Seven examples of Galaxy7TM predictions are shown in detail. Input GPCR structure is shown in sky blue, Galaxy7TM result in purple, and the crystal structure in brown. (A)  $\mu$ -opioid receptor (P42866) bound to the agonist BU72 (PDB ID: 5c1m). Sequence identity (59.2%) and GDT-HA of input structure (46.9) are high. A very accurate prediction with ligand RMSD = 1.31 Å and contact ratio = 30.3% was achieved. Charge interaction between the positive N atom of the ligand and a negative O atom of Asp147 could be captured. (B) Nociceptin receptor (P41146) bound to a peptide-mimetic antagonist compound-24 (PDB ID: 4ea3). Although sequence identity (58.9%) and GDT-HA of input structure (74.2) are high, a low-accuracy prediction with ligand RMSD = 4.82 Å and contact ratio = 16.1% was obtained. A wrong interaction between a positive N atom of ligand and a negative O atom of Asp130 was made. Sidechain structure of an important binding pocket residue Met134 was inaccurately predicted. In addition, the docked ligand took place of a water molecule observed in the crystal structure, which could not be explicitly considered in the current method. (C) 5-Hydroxytryptamine receptor 2B (P41595) bound to ergotamine (PDB ID: 4ib4). Sequence identity (31.1%) and GDT-HA of input structure (52.2) are intermediate, and a high-accuracy prediction with ligand RMSD = 1.60 Å and contact ratio = 44.7% was achieved. Hydrophobic interaction between binding site residues (Trp337, Phe340, and Phe341) and hydrophobic moiety of ligand was predicted accurately. Charge interaction between a positive N atom of the ligand and a negative O atom of Asp135 could be captured. (D) Corticotropin-releasing factor receptor (P34998) bound to CP-376395 (PDB ID: 4k5y). Sequence identity (33.5%) and GDT-HA of input structure (46.0) are intermediate, and a very low-accuracy prediction with ligand RMSD = 16.6 Å and contact ratio = 3.3% was obtained. This failure is mainly due to the wrong assignment of the docking grid box position. If binding residues are known in advance and provided as optional input, this problem can be avoided. (E)  $\beta$ -2 adrenergic receptor (P07550) bound to the agonist BI167107 (PDB ID: 4lde). Sequence identity (35.5%) and GDT-HA of input structure (56.9) are intermediate, and a low-accuracy prediction with ligand RMSD = 6.39 Å and contact ratio = 11.1% was obtained. Due to the wrong sequence alignment near the extracellular loop region, the loop structure blocked the native ligand-binding position in the input structure. Currently, Galaxy7TM does not perform loop modeling for structure refinement but is considered to be implemented in the future. Using models with different sequence alignments for loop anchor regions can alleviate the problem for now. (F) Orexin receptor type 2 (O43614) bound to suvorexant (PDB ID: 4s0v). Sequence identity (22.5%) and GDT-HA of input structure (60.9) are relatively low, but a high-accuracy prediction with ligand RMSD = 0.68 Å and contact ratio = 40.7% was obtained. The input structure quality is relatively high considering the sequence identity. Local interactions such as that between a ligand O atom and a N atom of Asn324 could be captured. (G) Proteinase-activated receptor 1 (P25116) bound to vorapaxar (PDB ID: 3vw7). Sequence identity (21.1%) and GDT-HA of input structure (45.8) are low, and a low-accuracy prediction with ligand RMSD = 8.90 Å and contact ratio = 8.6% was obtained. The transmembrane helix orientations of the input structure are incorrect, resulting in a binding pocket with inaccurate shape. Galaxy7TM has limitations for input structures generated by using templates with sequence identity lower than 20%.

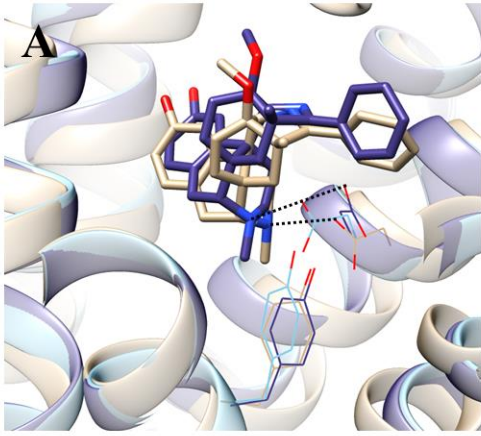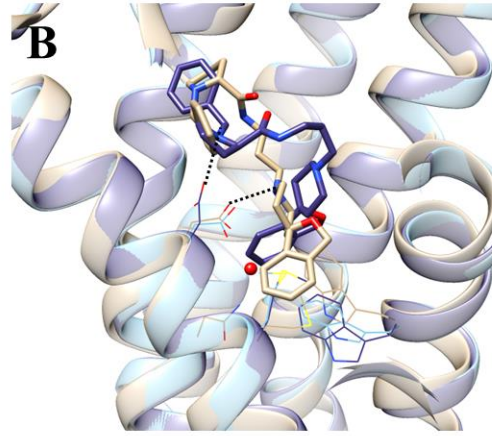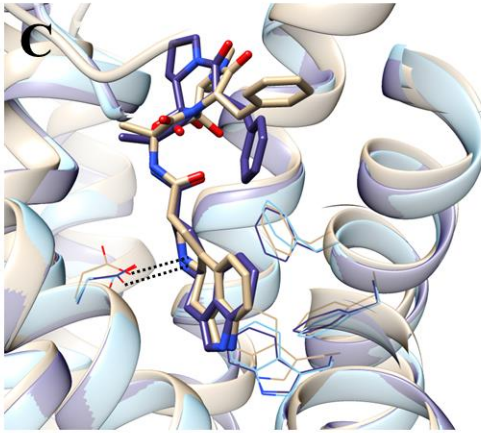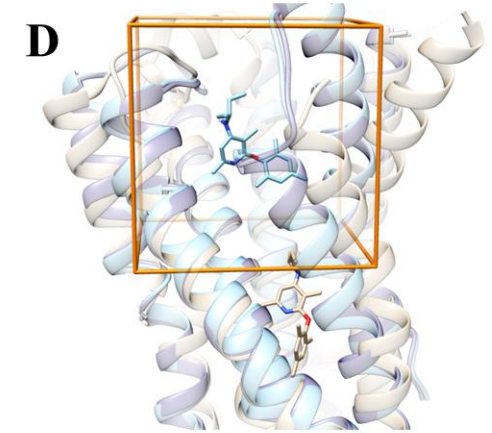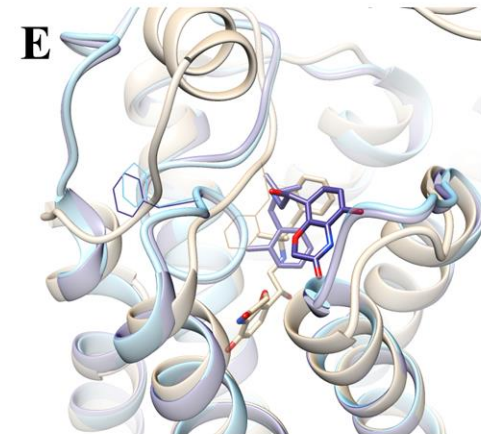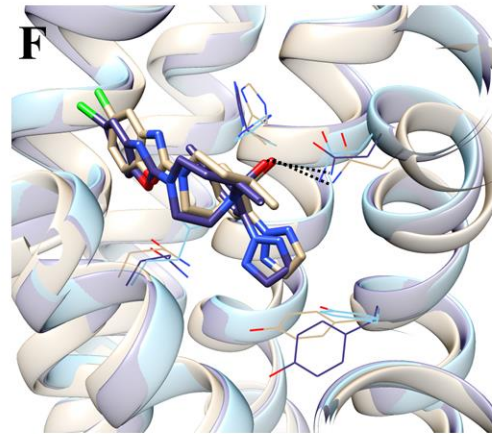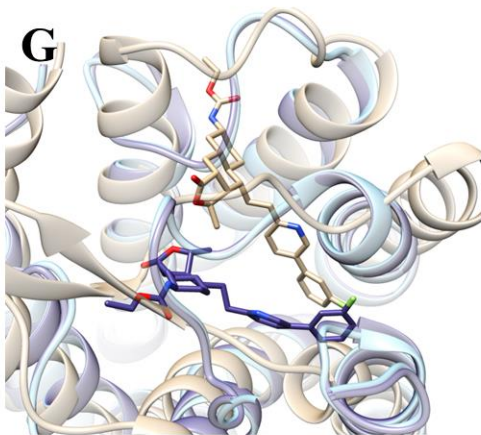

## References

1. Ko,J., Park,H. and Seok,C. (2012) GalaxyTBM: template-based modeling by building a reliable core and refining unreliable local regions. *BMC Bioinf.*, 13, 198.
2. Sali,A. and Blundell,T.L. (1993) Comparative protein modelling by satisfaction of spatial restraints. *J. Mol. Biol.*, 234, 779-815.
3. Zhang,J., Yang,J.Y., Jang,R. and Zhang,Y. (2015) GPCR-I-TASSER: A Hybrid Approach to G Protein-Coupled Receptor Structure Modeling and the Application to the Human Genome. *Structure*, 23, 1538-1549.
4. Trott,O. and Olson,A.J. (2010) AutoDock Vina: improving the speed and accuracy of docking with a new scoring function, efficient optimization, and multithreading. *J. Comput. Chem.*, 31, 455-461.
5. Kopp,J., Bordoli,L., Battey,J.N.D., Kiefer,F. and Schwede,T. (2007) Assessment of CASP7 predictions for template-based modeling targets. *Proteins: Struct., Funct., Bioinf.*, 69, 38-56.
6. Nugent,T., Cozzetto,D. and Jones,D.T. (2014) Evaluation of predictions in the CASP10 model refinement category. *Proteins: Struct., Funct., Bioinf.*, 82 Suppl 2, 98-111.
7. Heo,L., Park,H. and Seok,C. (2013) GalaxyRefine: Protein structure refinement driven by side-chain repacking. *Nucleic Acids Res.*, 41, W384-388.
8. Lee,G.R., Heo,L. and Seok,C. (2015) Effective protein model structure refinement by loop modeling and overall relaxation. *Proteins: Struct., Funct., Bioinf.*, in press.
9. Alford,R.F., Koehler Leman,J., Weitzner,B.D., Duran,A.M., Tilley,D.C., Elazar,A. and Gray,J.J. (2015) An Integrated Framework Advancing Membrane Protein Modeling and Design. *PLoS Comput. Biol.*, 11, e1004398.
